# Supplementary material for: Deconvolution of gene expression from cell populations across the C. elegans lineage
Source: PubMed Central journal article supplement (PMC3704917; doi:10.1186/1471-2105-14-204), 2013-06-22

### alr-1 , 2 million samples

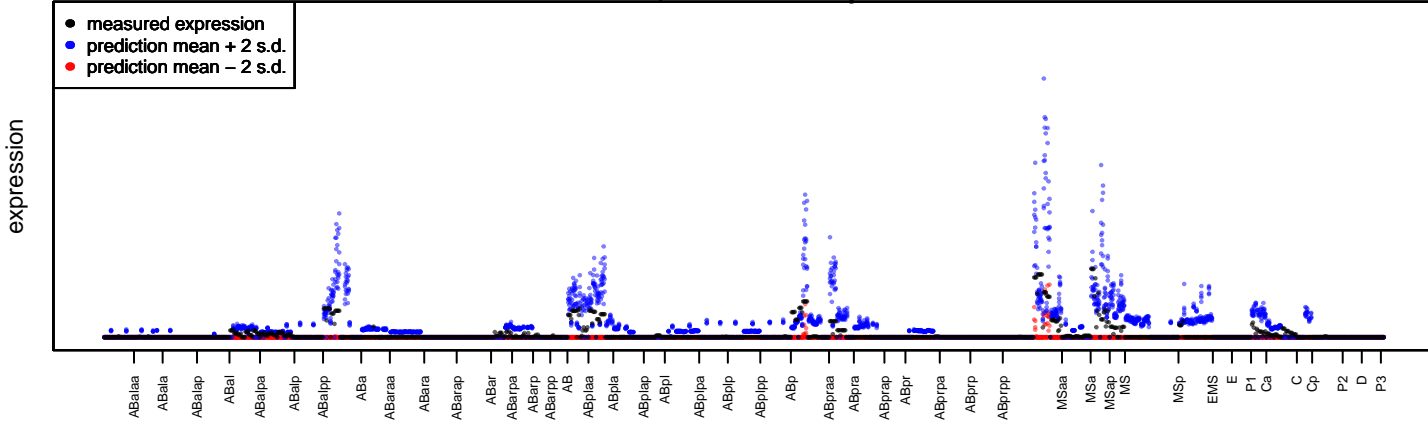

### alr-1 , 10 million samples

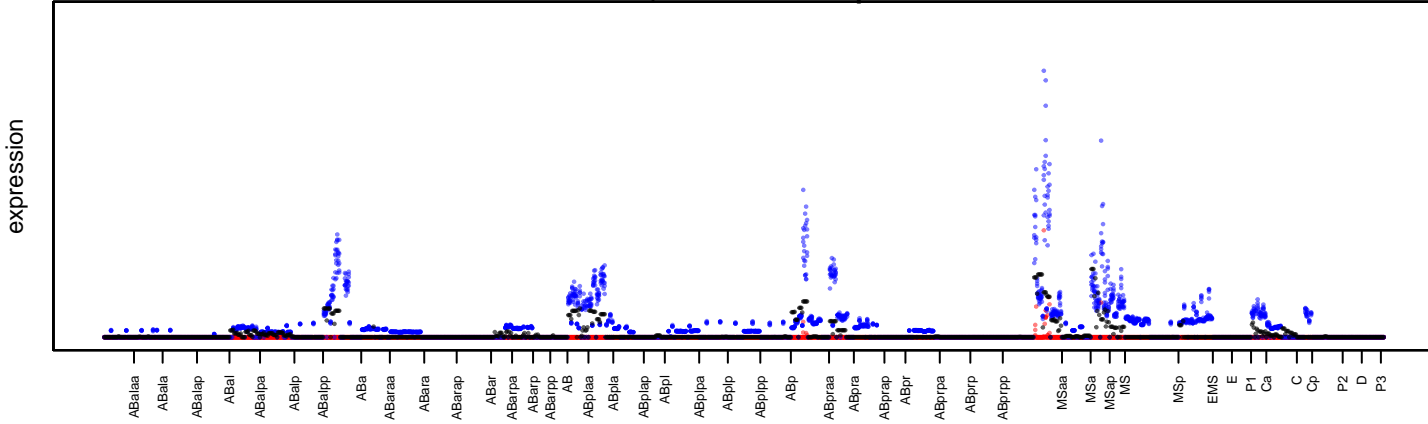

### alr-1 , 20 million samples

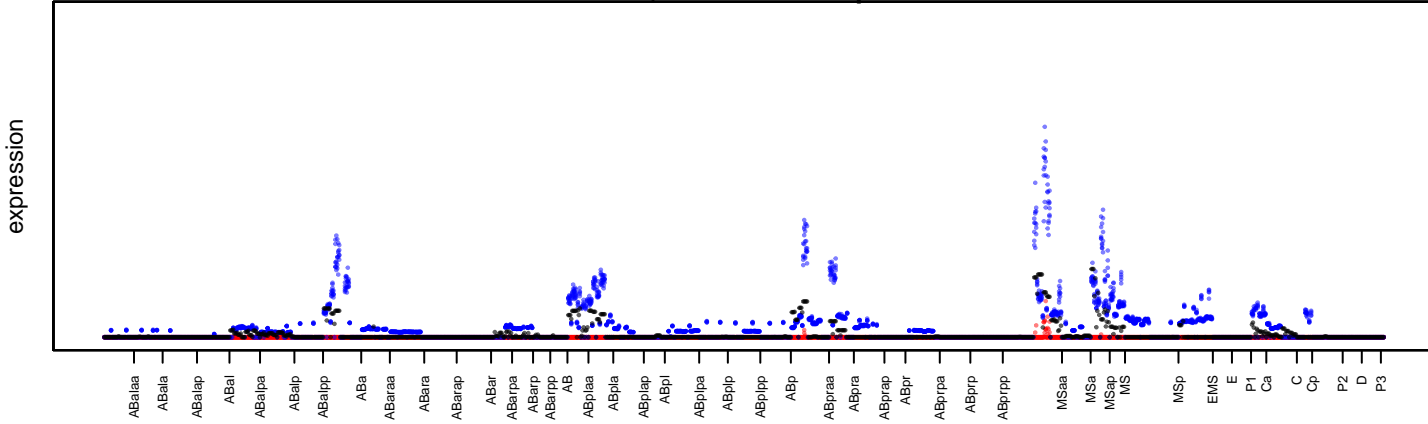

### alr-1 , 50 million samples

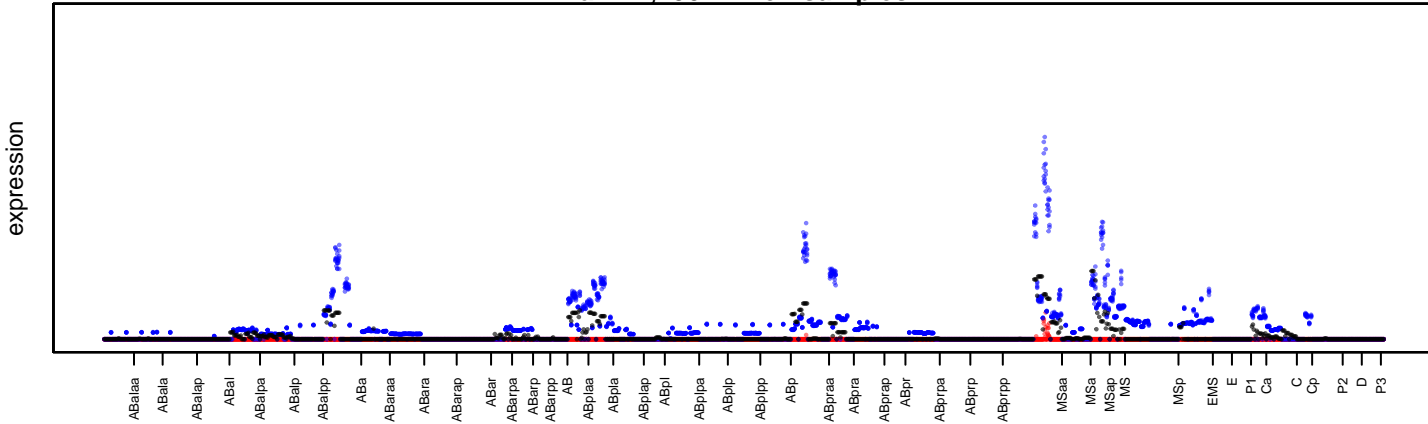

Supplement: 1471-2105-14-204-S5.pdf [file 1471-2105-14-204-S5.pdf]
