# Supplementary material for: Deconvolution of gene expression from cell populations across the C. elegans lineage
Source: PubMed Central journal article supplement (PMC3704917; doi:10.1186/1471-2105-14-204), 2013-06-22

# alr-1 potential scale reduction

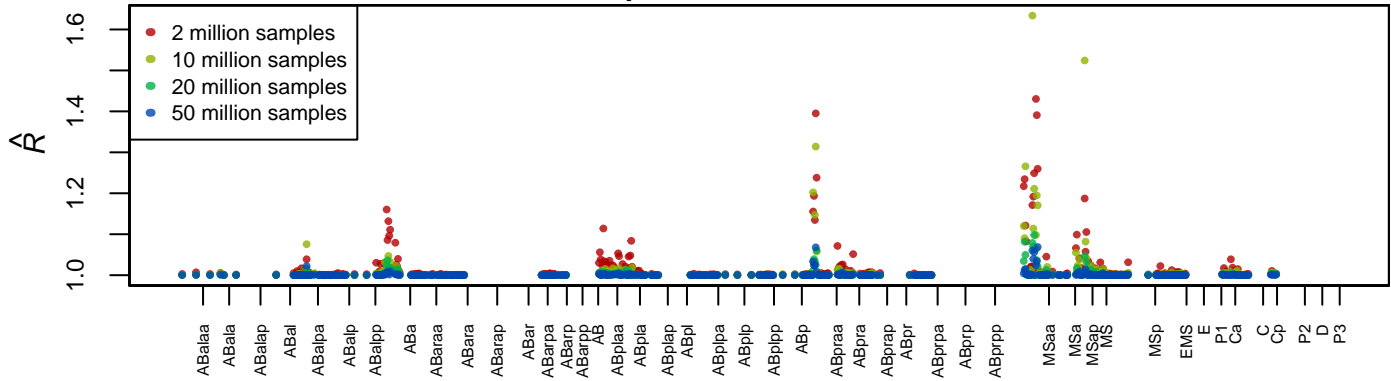

Supplement: 1471-2105-14-204-S6.pdf [file 1471-2105-14-204-S6.pdf]
